# Supplementary material for: Comparative Analysis of Actaea Chloroplast Genomes and Molecular Marker Development for the Identification of Authentic Cimicifugae Rhizoma
Source: PubMed Central journal article supplement (PMC7076663; doi:10.3390/plants9020157), 2020-01-27
Supplement: plants-09-00157-s001.pdf [file plants-09-00157-s001.pdf]

## SUPPLEMENTARY MATERIALS

# Comparative Analysis of *Actaea* Chloroplast Genomes and Molecular Marker Development for the Identification of Authentic Cimicifugae Rhizoma

Inkyu Park, Jun-Ho Song, Sungyu Yang and Byeong Cheol Moon\*

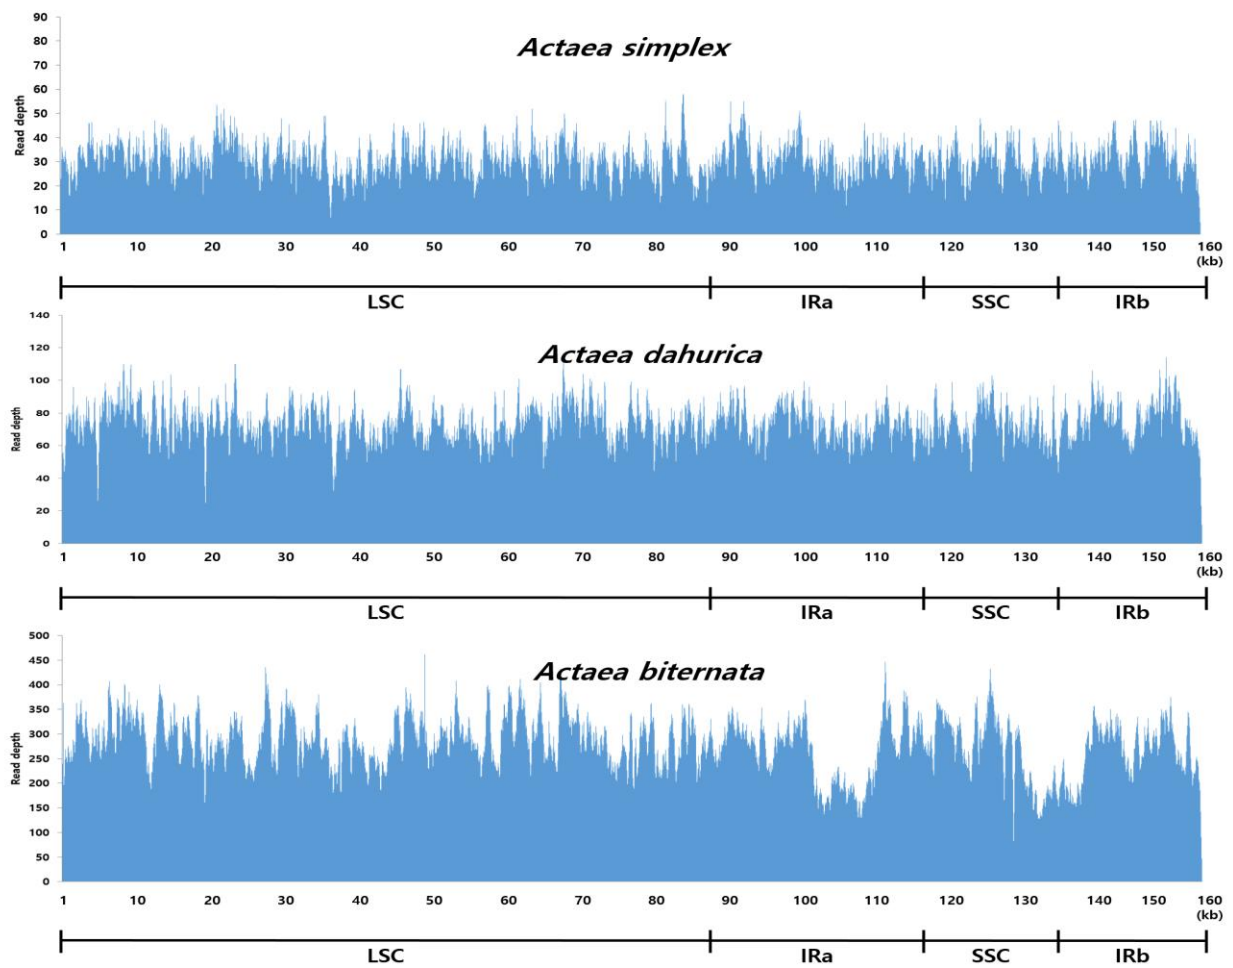

**Figure S1:** Validation of the complete chloroplast (cp) genomes of three *Actaea* species, *A. simplex*, *A. dahurica*, and *A. biternata* using raw read mapping. LSC, large single copy region; SSC, small single copy region; IRa, inverted repeat a; IRb, inverted repeat b.

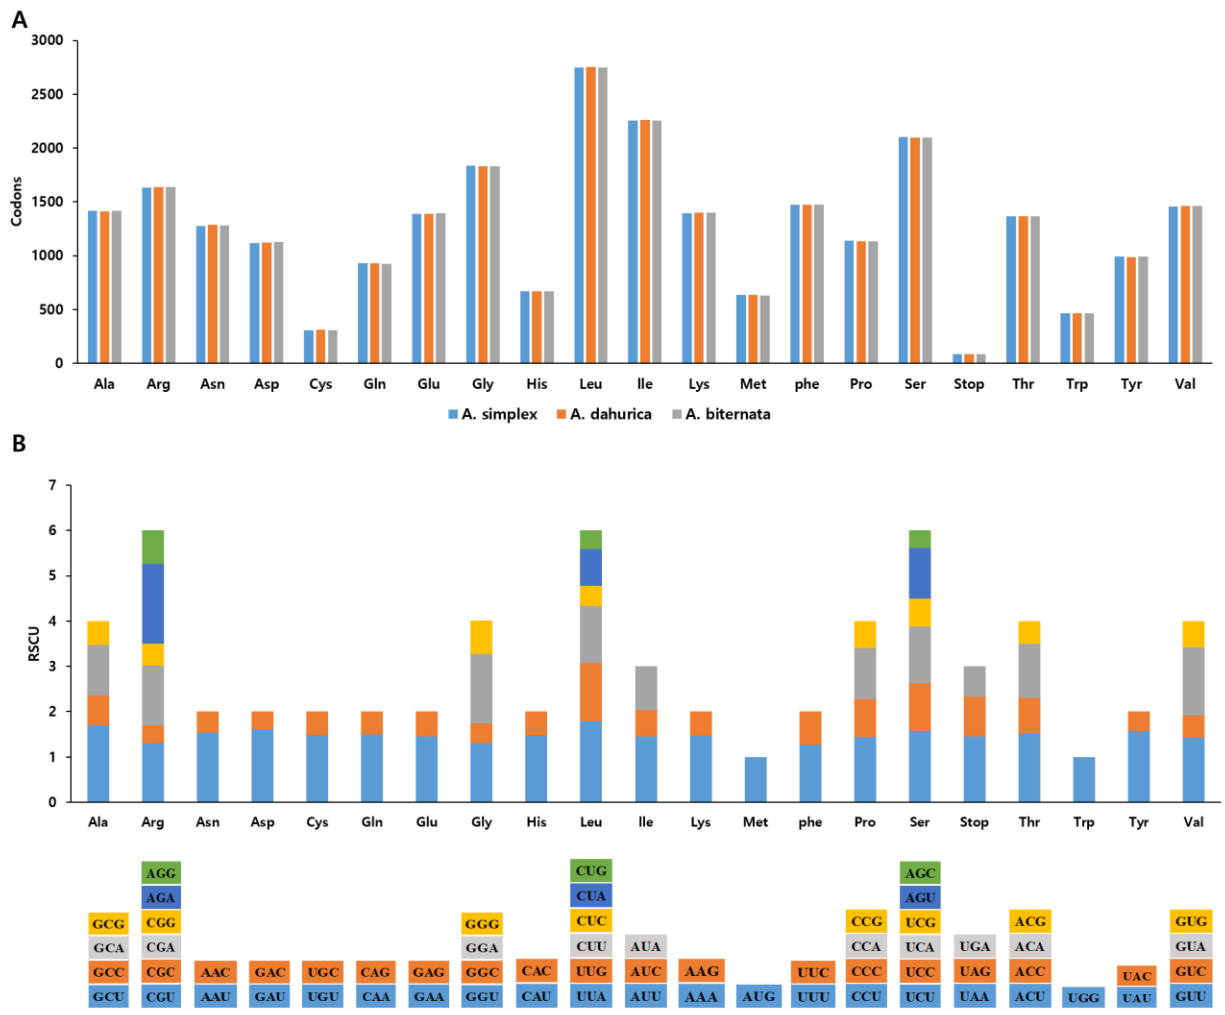

**Figure S2:** Codon frequencies and RSCU (relative synonymous codon usage) values of three *Actaea* species, *A. simplex*, *A. dahurica*, and *A. biternata*. (A) Amino acid frequencies in protein-coding genes. (B) RSCU values of 20 amino acids and stop codons in 78 protein-coding genes.

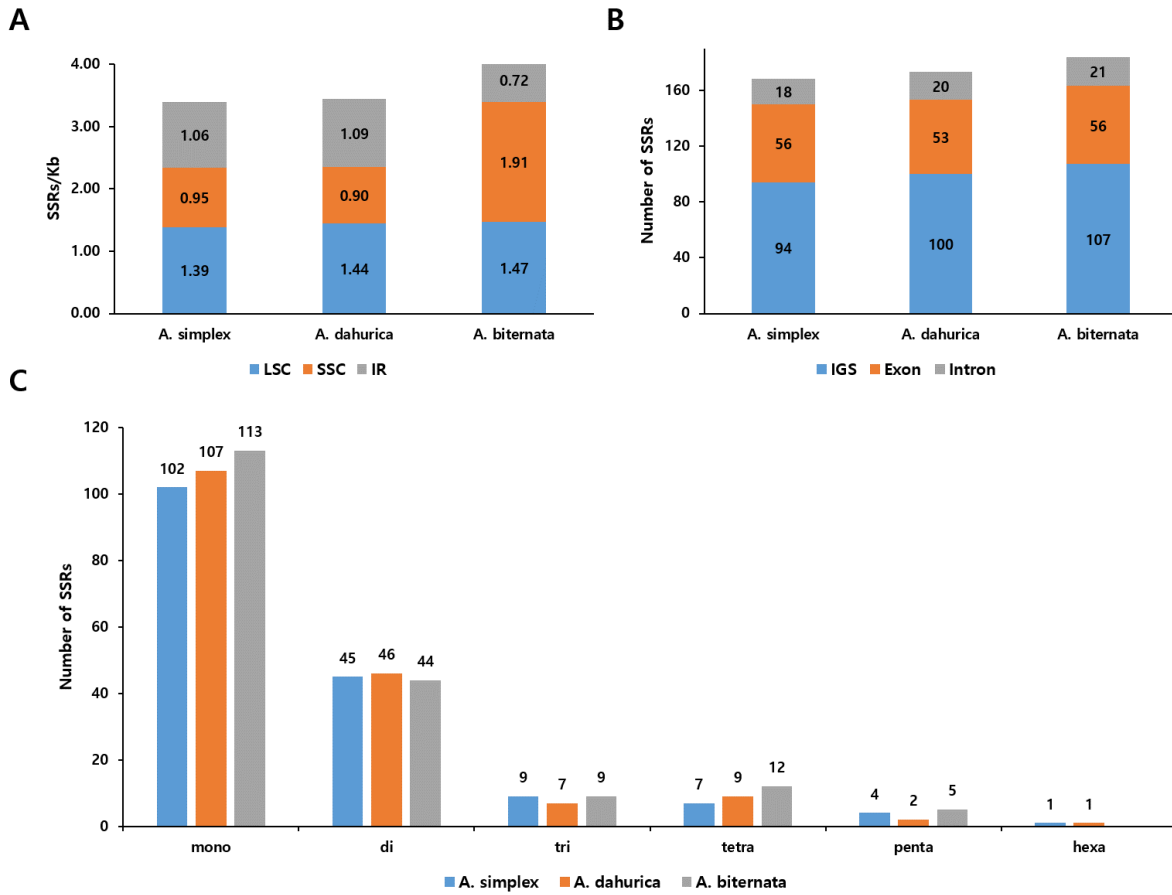

**Figure S3:** Distribution of simple sequence repeats (SSRs) in cp genomes of three *Actaea* species. (a) Number of SSRs per unit length. (b) Distribution of SSRs in exons, introns and intergenic spacer (IGS) regions. (c) Distribution of different types of SSRs.

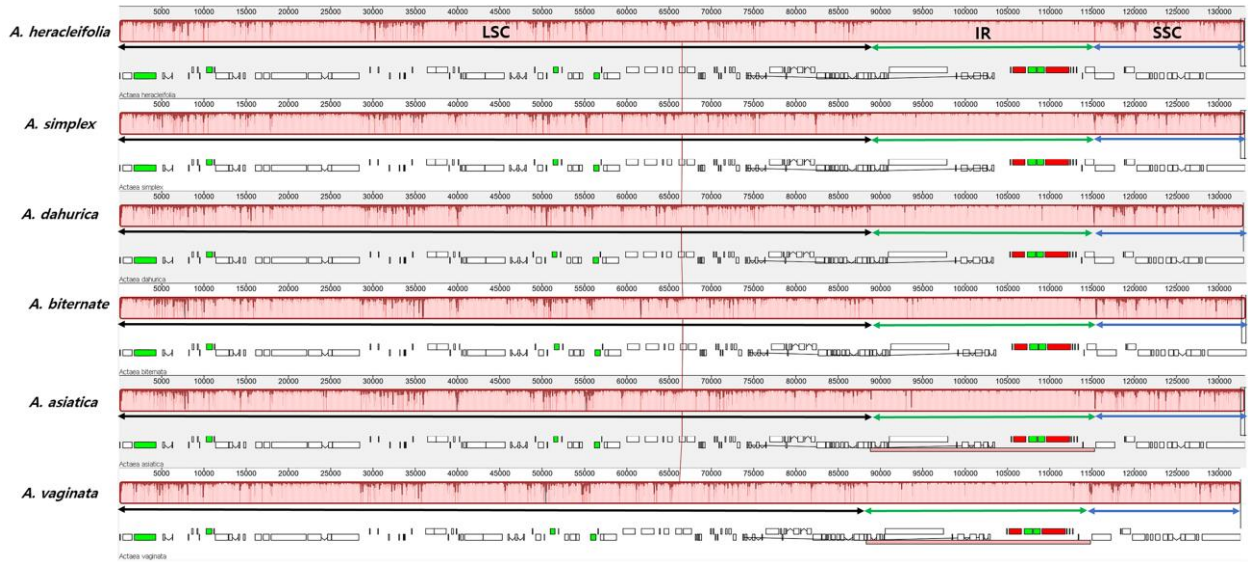

**Figure S4.** Comparison of complete cp genomes of six *Actaea* species using the MAUVE algorithm. Local collinear blocks colored in red indicate syntenic regions, while histograms within each block represent the degree of sequence similarity. Arrows indicate the large single copy (LSC), inverted repeat (IR), and small single copy (SSC) regions. Green color blocks means tRNAs with intron. And red color block indicates rRNAs.

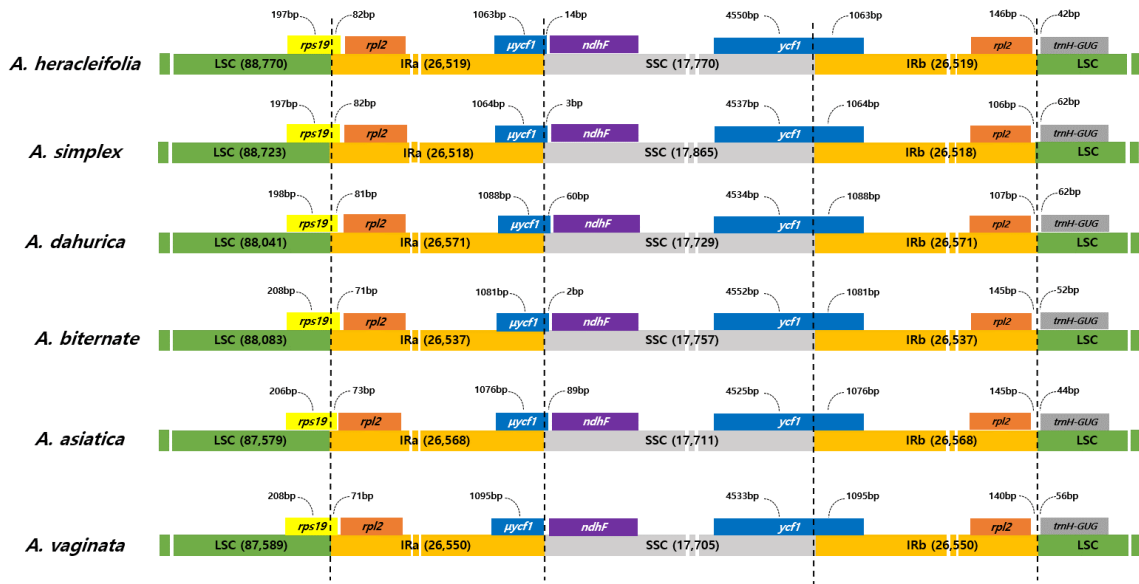

**Figure S5:** Comparison of the position of junctions between the large single copy (LSC) region, inverted repeat (IR) regions (IRa and IRb), and small single copy (SSC) region in the cp genomes of six *Actaea* species.

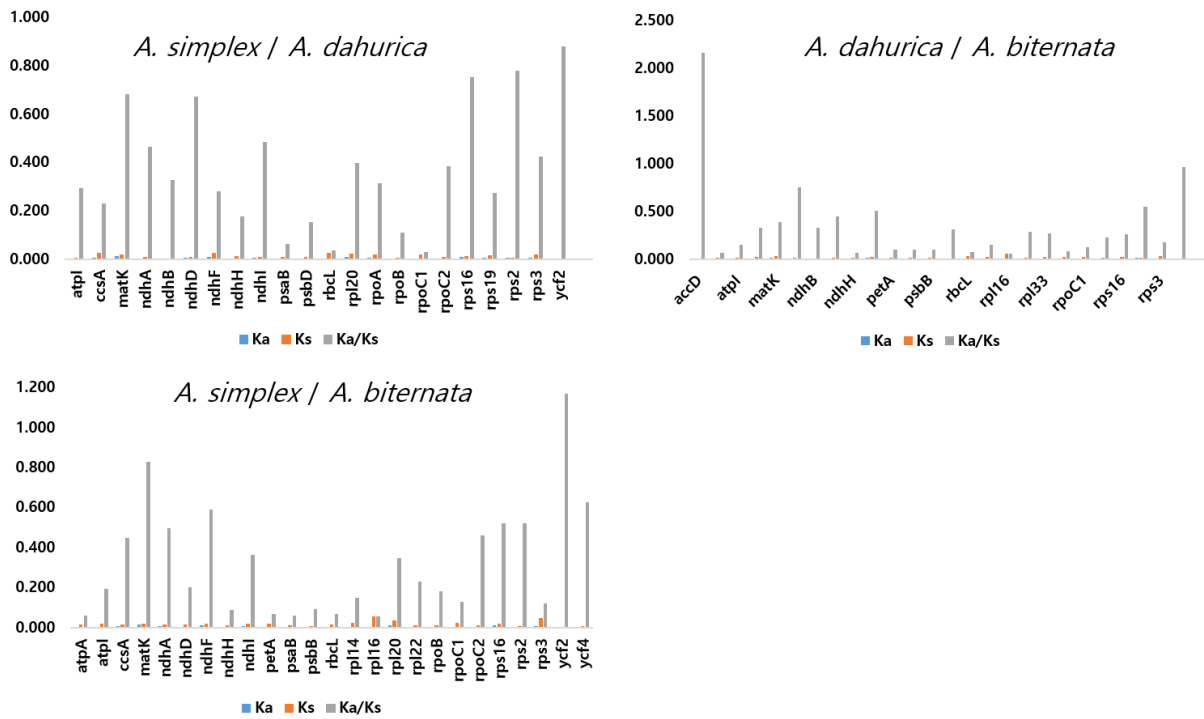

**Figure S6:** Comparison of non-synonymous substitution rate (Ka), synonymous substitution rate (Ks) and Ka/Ks ratio of 67 conserved protein-coding genes among the cp genomes of *A. simplex*, *A. dahurica*, and *A. biternata*. Blue and orange bars indicate Ka and Ks values, respectively, while gray bars indicate Ka/Ks ratios. Genes with Ka or Ks values of 0 are not shown.

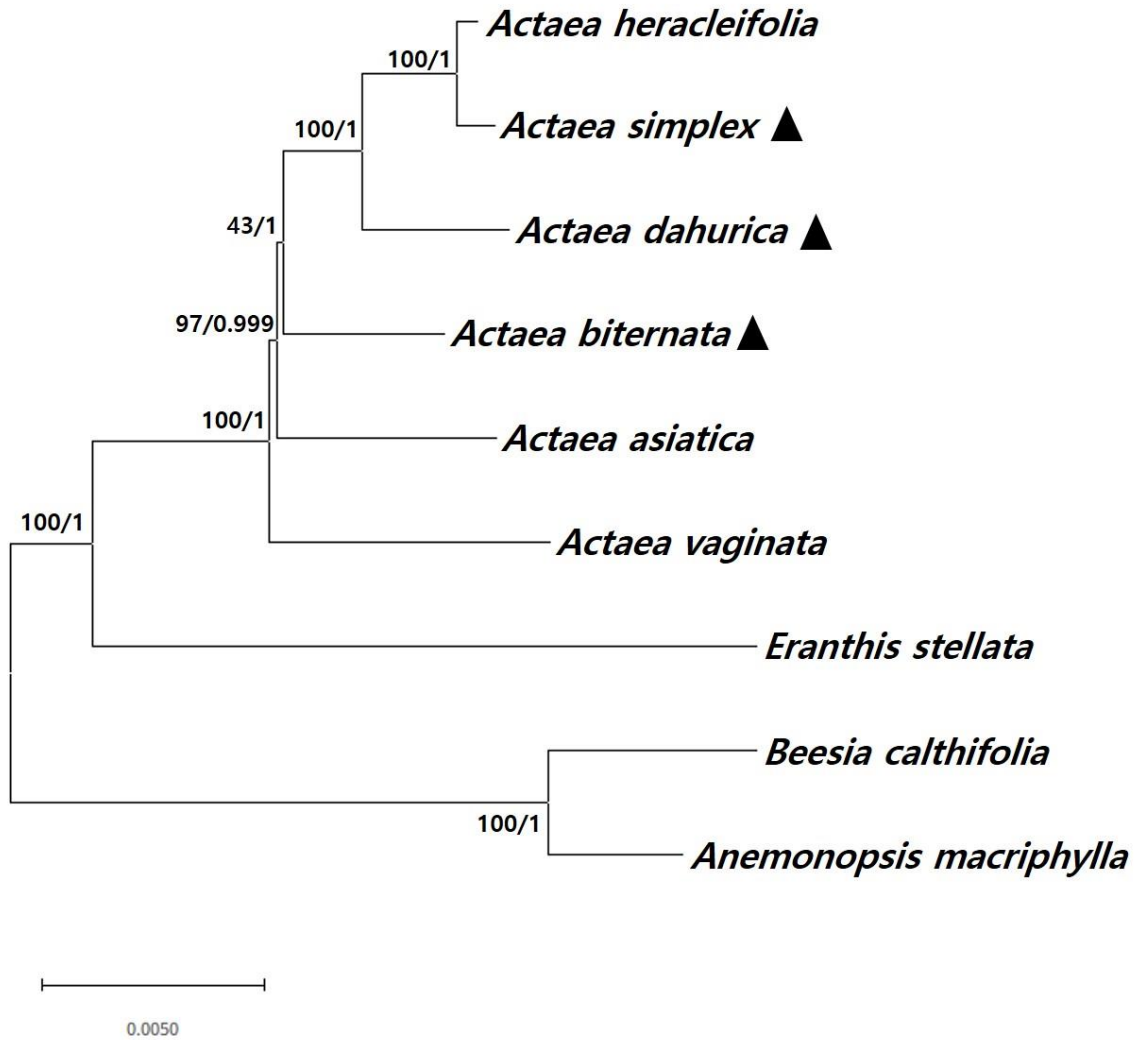

**Figure S7:** Phylogenetic analysis of nine species within the tribe Cimicifugeae. The phylogenetic tree was constructed with the maximum likelihood (ML) method and Bayesian Inference (BI) using whole cp genome sequences of six *Actaea* species and one *Eranthis* species. *Beesia calthifolia* and *Anemonopsis macriphylla* were used as outgroups. ML topology is shown with bootstrap (BS) values (%) and BI posterior probability (PP) values at each node. Black triangles indicate the cp genomes of three *Actaea* species investigated in this study.

**Table S1:** Raw read and assembly information of the chloroplast (cp) genomes of three *Actaea* species.

|                         | <i>A. simplex</i> | <i>A. dahurica</i> | <i>A. biternata</i> |
|-------------------------|-------------------|--------------------|---------------------|
| Number of input reads   | 7,455,916         | 7,348,266          | 8,077,362           |
| Number of trimmed reads | 6,415,201         | 6,240,189          | 7,211,294           |
| Total raw bases (bp)    | 2,196,684,451     | 2,184,464,508      | 2,347,534,148       |
| Trimmed bases (bp)      | 1,500,015,928     | 1,462,941,174      | 1,706,161,420       |
| Number of aligned reads | 22,304            | 52,247             | 194,903             |
| Coverage (×)            | 31.51             | 74.67              | 280.52              |
| cp genome length (bp)   | 159,624           | 159,523            | 159,789             |



**Table S2:** Primers used for PCR-based sequence validation of cp junctions in three *Actaea* species.

| <b>Primer name</b> | <b>Primer sequence (5'→3')</b> | <b>Junction<sup>†</sup></b> |
|--------------------|--------------------------------|-----------------------------|
| LI_F               | CCCGGACCAAGTTACGATT            | LSC/IRa                     |
| LI_R               | AGTTTGATTCTTCGTCGCCGT          |                             |
| IS_F               | ACTTCCGAAACGAAGGGGAC           | IRa/SSC                     |
| IS_R               | AAATATGTAGGCCGAGGGCG           |                             |
| SI_F               | CGTTGCTCAGGTTGTTTCGT           | SSC/IRb                     |
| SI_R               | GGATCCACCGAAGAAGACCC           |                             |
| IL_F               | AACCCTGTAGACCATCCCCA           | IRb/LSC                     |
| IL_R               | GTTCAATCCCGTCGTTCCG            |                             |

<sup>†</sup>LSC, large single copy region; SSC, small single copy region; IRa, inverted repeat a; IRb, inverted repeat b.

**Table S3:** Information of PCR-based sequencing.

| Species             | Junction <sup>†</sup> | PCR product size (bp) | Start position (bp) | End position (bp) | Identity (%) |
|---------------------|-----------------------|-----------------------|---------------------|-------------------|--------------|
| <i>A. simplex</i>   | LSC/IRa               | 202                   | 88,697              | 88,898            | 100          |
|                     | IRa/SSC               | 240                   | 114,964             | 115,203           | 100          |
|                     | SSC/IRb               | 558                   | 132,791             | 133,348           | 100          |
|                     | IRb/LSC               | 364                   | 159,324             | 63                | 100          |
| <i>A. dahurica</i>  | LSC/IRa               | 207                   | 88,625              | 88,831            | 100          |
|                     | IRa/SSC               | 467                   | 114,922             | 115,388           | 100          |
|                     | SSC/IRb               | 556                   | 132,663             | 133,218           | 100          |
|                     | IRb/LSC               | 379                   | 159,219             | 74                | 100          |
| <i>A. biternata</i> | LSC/IRa               | 213                   | 88,921              | 89,133            | 100          |
|                     | IRa/SSC               | 517                   | 115,201             | 115,717           | 100          |
|                     | SSC/IRb               | 562                   | 132,950             | 133,511           | 100          |
|                     | IRb/LSC               | 374                   | 159,489             | 73                | 100          |

<sup>†</sup>LSC, large single copy region; SSC, small single copy region; IRa, inverted repeat a; IRb, inverted repeat b.

**Table S4:** Genes present in the cp genomes of three *Actaea* species.

| Gene group                                 | Gene name                                                                                                                                                                                                                                                                                                                                                                                     |
|--------------------------------------------|-----------------------------------------------------------------------------------------------------------------------------------------------------------------------------------------------------------------------------------------------------------------------------------------------------------------------------------------------------------------------------------------------|
| Photosystem I                              | <i>psaA, B, C, I, J, ycf3<sup>†</sup>, ycf4</i>                                                                                                                                                                                                                                                                                                                                               |
| Photosystem II                             | <i>psbA, B, C, D, E, F, H, I, J, K, L, M, N, T, Z</i>                                                                                                                                                                                                                                                                                                                                         |
| Cytochrome b6/f                            | <i>petA, B<sup>§</sup>, D<sup>§</sup>, G, L, N</i>                                                                                                                                                                                                                                                                                                                                            |
| ATP synthase                               | <i>atpA, B, E, F<sup>§</sup>, H, I</i>                                                                                                                                                                                                                                                                                                                                                        |
| Rubisco                                    | <i>rbcL</i>                                                                                                                                                                                                                                                                                                                                                                                   |
| NADH oxidoreductase                        | <i>ndhA<sup>§</sup>, B<sup>§¶</sup>, C, D, E, F, G, H<sup>¶</sup>, I, J, K</i>                                                                                                                                                                                                                                                                                                                |
| Large ribosomal subunit proteins           | <i>rpl2, 14, 16<sup>§</sup>, 20, 22, 33, 36</i>                                                                                                                                                                                                                                                                                                                                               |
| Small ribosomal subunit proteins           | <i>rps2, 3, 4, 7<sup>¶</sup>, 8, 11, 12<sup>†¶</sup>, 14, 15, 18, 19</i>                                                                                                                                                                                                                                                                                                                      |
| RNA polymerase                             | <i>rpoA, B, C1<sup>§</sup>, C2</i>                                                                                                                                                                                                                                                                                                                                                            |
| Protein-coding genes with unknown function | <i>ycf1, ycf2</i>                                                                                                                                                                                                                                                                                                                                                                             |
| Other genes                                | <i>accD, ccsA, cemA, clpP<sup>†</sup>, matK</i>                                                                                                                                                                                                                                                                                                                                               |
| Ribosomal RNA (rRNA) genes                 | <i>rrn16<sup>¶</sup>, 23<sup>¶</sup>, 4.5<sup>¶</sup>, 5<sup>¶</sup></i>                                                                                                                                                                                                                                                                                                                      |
| Transfer RNA (tRNA) genes                  | <i>trnA-UGC<sup>§¶</sup>, trnC-GCA, trnD-GUC, trnE-UUC, trnF-GAA, trnI-M-CAU, trnG-GCC, trnG-UCC, trnH-GUG, trnI-CAU, trnI-GAU<sup>§¶</sup>, trnK-UUU, trnL-CAA, trnL-UAA, trnL-UAG, trnL-CAA<sup>¶</sup>, trnM-CAU, trnN-GUU<sup>¶</sup>, trnP-UGG, trnQ-UUG, trnR-ACG<sup>¶</sup>, trnR-UCU, trnS-GCU, trnS-GGA, trnS-UGA, trnT-GGU, trnT-UGU, trnV-GAC<sup>¶</sup>, trnW-CCA, trnY-GUA</i> |

<sup>§</sup>Genes containing a single intron.

<sup>†</sup>Genes containing two introns.

<sup>¶</sup>Genes with two copies in inverted repeats (IRs).

<sup>‡</sup>Trans-splicing gene.

**Table S5:** Gene intron in cp genomes of three *Actaea* species.

|    | <b>Gene name</b> | <b>Location<sup>†</sup></b> | <b>Exon I (bp)<sup>§</sup></b> | <b>Intron I (bp)<sup>§</sup></b> | <b>Exon II (bp)<sup>§</sup></b> | <b>Intron II (bp)</b> | <b>Exon III (bp)</b> |
|----|------------------|-----------------------------|--------------------------------|----------------------------------|---------------------------------|-----------------------|----------------------|
| 1  | <i>trnk-UUU</i>  | LSC                         | 37                             | 2544 (2551, 2543)                | 35                              |                       |                      |
| 2  | <i>rps16</i>     | LSC                         | 40                             | 892 (892, 907)                   | 221                             |                       |                      |
| 3  | <i>trnG-UCC</i>  | LSC                         | 23                             | 694 (688, 688)                   | 48                              |                       |                      |
| 4  | <i>atpF</i>      | LSC                         | 144                            | 728 (723, 727)                   | 411                             |                       |                      |
| 5  | <i>rpoC1</i>     | LSC                         | 435                            | 754 (759, 754)                   | 1620                            |                       |                      |
| 6  | <i>ycf3</i>      | LSC                         | 126                            | 713 (715, 715)                   | 226                             | 757 (744, 745)        | 155                  |
| 7  | <i>trnL-UAA</i>  | LSC                         | 35                             | 508 (505, 502)                   | 50                              |                       |                      |
| 8  | <i>trnV-UAC</i>  | LSC                         | 38                             | 581 (582, 581)                   | 37                              |                       |                      |
| 9  | <i>rps12</i>     | LSC                         | 232                            |                                  | 26                              |                       | 114                  |
| 10 | <i>clpP</i>      | LSC                         | 69                             | 812 (813, 807)                   | 291                             | 646 (636, 633)        | 246                  |
| 11 | <i>petB</i>      | LSC                         | 6                              | 803 (800, 799)                   | 642                             |                       |                      |
| 12 | <i>petD</i>      | LSC                         | 8                              | 723                              | 496                             |                       |                      |
| 13 | <i>rpl16</i>     | LSC                         | 9                              | 999 (998, 1004)                  | 402                             |                       |                      |
| 14 | <i>ndhB</i>      | IR                          | 777                            | 700                              | 756                             |                       |                      |
| 15 | <i>trnI-GAU</i>  | IR                          | 42                             | 941                              | 35                              |                       |                      |
| 16 | <i>trnA-UGC</i>  | IR                          | 38                             | 803 (803, 800)                   | 35                              |                       |                      |
| 17 | <i>ndhA</i>      | IR                          | 551                            | 905 (920, 917)                   | 541                             |                       |                      |

<sup>†</sup>LSC, large single copy region; SSC, small single copy region; IR, inverted repeat.

<sup>§</sup>Numbers in parentheses represent the length of corresponding sequences in *A. dahurica* and *A. biternata*.

**Table S6:** Tandem repeats detected in the cp genome of *A. simplex*.

| <i>A. simplex</i> | Position <sup>†</sup>                     | Repeat unit length (bp) | Repeat unit sequence          | Repeat number | Location <sup>§</sup> |
|-------------------|-------------------------------------------|-------------------------|-------------------------------|---------------|-----------------------|
| 1                 | IGS ( <i>trnK-UUUU</i> , <i>rps16</i> )   | 23                      | TTTTTTCGTTATTTATTTTA<br>TAT   | 2             | LSC                   |
| 2                 | IGS ( <i>rps16</i> , <i>trnQ-UUG</i> )    | 12                      | ATATATATTATA                  | 2             | LSC                   |
| 3                 | IGS ( <i>rps16</i> , <i>trnQ-UUG</i> )    | 16                      | AGATTGTTCAAGACAA              | 2             | LSC                   |
| 4                 | IGS ( <i>rps16</i> , <i>trnQ-UUG</i> )    | 8                       | GTAATAAA                      | 3             | LSC                   |
| 5                 | IGS ( <i>trnS-GCU</i> , <i>trnG-UCC</i> ) | 13                      | AATTGAATAAAAA                 | 2             | LSC                   |
| 6                 | IGS ( <i>atpH</i> , <i>atpI</i> )         | 19                      | TTCATTAGTCTGAATCCTT           | 2             | LSC                   |
| 7                 | IGS ( <i>petN</i> , <i>psbM</i> )         | 13                      | TACGAGAATCCAG                 | 2             | LSC                   |
| 8                 | IGS ( <i>petN</i> , <i>psbM</i> )         | 15                      | TTTTACAAATATGAA               | 2             | LSC                   |
| 9                 | IGS ( <i>trnS-GGA</i> , <i>rps4</i> )     | 17                      | ATACTGCAATAATATGA             | 2             | LSC                   |
| 10                | IGS ( <i>trnL-UAA</i> , <i>trnF-GAA</i> ) | 25                      | TCTTTCACAAAAGGATCG<br>TGGGAGA | 2             | LSC                   |
| 11                | Exon ( <i>accD</i> )                      | 15                      | AATGACTATTCATCT               | 2             | LSC                   |
| 12                | IGS ( <i>psaI</i> , <i>ycf4</i> )         | 17                      | TATGTAGATATCCATAG             | 2             | LSC                   |
| 13                | Intron ( <i>rpl16</i> )                   | 15                      | TTAATGCTTTATTAC               | 2             | LSC                   |
| 14                | Exon ( <i>ycf2</i> )                      | 21                      | TCTTTTTGTCCAAGTCGCT<br>TC     | 3             | IR                    |
| 15                | Exon ( <i>ycf2</i> )                      | 18                      | TATTGATGATAGTGACGA            | 3             | IR                    |
| 16                | IGS ( <i>rps12</i> , <i>trnV-GAC</i> )    | 16                      | ATTTTATTGATTTATT              | 2             | IR                    |
| 17                | IGS ( <i>rrn5</i> , <i>trnR-ACG</i> )     | 15                      | AATATGAAAAAAAAA               | 2             | IR                    |
| 18                | IGS ( <i>ndhF</i> , <i>trnL-UAG</i> )     | 21                      | ACAAATAGAACAAGTAA<br>AAAA     | 2             | SSC                   |
| 19                | IGS ( <i>ndhF</i> , <i>trnL-UAG</i> )     | 20                      | TTTATTCGTATTAATATTA<br>A      | 2             | SSC                   |
| 20                | IGS ( <i>ndhE</i> , <i>ndhG</i> )         | 22                      | AATTAACTAAAATATAAT<br>ATAA    | 2             | SSC                   |
| 21                | Exon ( <i>ndhG</i> )                      | 12                      | GTATTTAGTATT                  | 2             | SSC                   |

<sup>†</sup>IGS, intergenic spacer region.

<sup>§</sup>LSC, large single copy region; SSC, small single copy region; IR, inverted repeat.

**Table S7:** Tandem repeats detected in the cp genome of *A. dahurica*.

| <i>A. dahurica</i> | Position <sup>†</sup>             | Repeat unit length (bp) | Repeat unit sequence          | Repeat number | Location <sup>§</sup> |
|--------------------|-----------------------------------|-------------------------|-------------------------------|---------------|-----------------------|
| 1                  | IGS ( <i>trnH-GUG, psbA</i> )     | 12                      | AATATATACAAA                  | 2             | LSC                   |
| 2                  | IGS ( <i>atpH, atpI</i> )         | 21                      | TAATACAAGCATGAATAC<br>AAA     | 2             | LSC                   |
| 3                  | IGS ( <i>atpH, atpI</i> )         | 19                      | TTCATTAGTCTGAATCCTT           | 2             | LSC                   |
| 4                  | IGS ( <i>petN, psbM</i> )         | 13                      | TACGAGAATCCAG                 | 2             | LSC                   |
| 5                  | IGS ( <i>petN, psbM</i> )         | 15                      | TTTTACAAATATGAA               | 2             | LSC                   |
| 6                  | IGS ( <i>psbM, trnD-GUC</i> )     | 8                       | AATCATAT                      | 3             | LSC                   |
| 7                  | IGS ( <i>trnE-UUC, trnT-GGU</i> ) | 8                       | ATTTCTAT                      | 3             | LSC                   |
| 8                  | IGS ( <i>trnE-UUC, trnT-GGU</i> ) | 15                      | TTCTTCAATTCAACT               | 2             | LSC                   |
| 9                  | IGS ( <i>psbZ, trnG-GCC</i> )     | 18                      | ATATATT                       | 2             | LSC                   |
| 10                 | IGS ( <i>ycf3, trnS-GGA</i> )     | 17                      | ATACTGCAATAATATGA             | 2             | LSC                   |
| 11                 | IGS ( <i>trnL-UAA, trnL-UAA</i> ) | 25                      | TCTTTCACAAAAGGATCG<br>TGGGAGA | 2             | LSC                   |
| 12                 | IGS ( <i>ndhC, trnV-UAC</i> )     | 13                      | TATATTTTATTGA                 | 2             | LSC                   |
| 13                 | IGS ( <i>ndhC, trnV-UAC</i> )     | 10                      | TATTATTATC                    | 2             | LSC                   |
| 14                 | IGS ( <i>ndhC, trnV-UAC</i> )     | 19                      | GTACAGTACAAATATAGT<br>A       | 2             | LSC                   |
| 15                 | IGS ( <i>atpB, rbcL</i> )         | 16                      | TTATTATTCATTATTA              | 2             | LSC                   |
| 16                 | IGS ( <i>rbcL, accD</i> )         | 15                      | AATGACTATTCATCT               | 2             | LSC                   |
| 17                 | IGS ( <i>rbcL, accD</i> )         | 17                      | TTAGTTTATAGTAATC              | 2             | LSC                   |
| 18                 | IGS ( <i>psaI, ycf4</i> )         | 17                      | TATGTAGATATCCATAG             | 2             | LSC                   |
| 19                 | Intron ( <i>rpl16</i> )           | 15                      | TTAATGCTTTATTAC               | 2             | LSC                   |
| 20                 | Exon ( <i>ycf2</i> )              | 21                      | TCTTTTTGTCCAAGTCGCT<br>TC     | 3             | IR                    |
| 21                 | Exon ( <i>ycf2</i> )              | 18                      | TATTGATGATAGTGACGA            | 4             | IR                    |
| 22                 | IGS ( <i>rps12, trnV-GAC</i> )    | 16                      | ATTTTATTGATTTATT              | 2             | IR                    |
| 23                 | IGS ( <i>rrn5, trnR-ACG</i> )     | 13                      | AATATGAAAAAAAA                | 2             | IR                    |

<sup>†</sup>IGS, intergenic spacer region.

<sup>§</sup>LSC, large single copy region; SSC, small single copy region; IR, inverted repeat.

**Table S8:** Tandem repeats detected in the cp genome of *A. biternata*.

| <i>A. biternata</i> | Position <sup>†</sup>          | Repeat unit length (bp) | Repeat unit sequence                                   | Repeat number | Location <sup>§</sup> |
|---------------------|--------------------------------|-------------------------|--------------------------------------------------------|---------------|-----------------------|
| 1                   | Intron ( <i>rps16</i> )        | 9                       | TATAGTATA                                              | 2             | LSC                   |
| 2                   | IGS ( <i>rps16, trnQ-UUG</i> ) | 21                      | ATAATAATACATATTTAT                                     | 2             | LSC                   |
| 3                   | IGS ( <i>rps16, trnQ-UUG</i> ) | 28                      | TTTAGAGATAAGGAATAT<br>ATAATATAAA                       | 2             | LSC                   |
| 4                   | IGS ( <i>rps16, trnQ-UUG</i> ) | 17                      | AATAGAAAAGAAAACAAA                                     | 2             | LSC                   |
| 5                   | IGS ( <i>atpH, atpI</i> )      | 19                      | TTCATTAGTCTGAATCCTT                                    | 2             | LSC                   |
| 6                   | IGS ( <i>petN, psbM</i> )      | 15                      | TTTTACAAATATGAA                                        | 2             | LSC                   |
| 7                   | IGS ( <i>trnT-GGU, psbD</i> )  | 25                      | TATTATCTATATAACGATA<br>TGGATA                          | 2             | LSC                   |
| 8                   | IGS ( <i>psbZ, trnG-GCC</i> )  | 24                      | TATAAATATATAATGTTAT<br>AGTTA                           | 2             | LSC                   |
| 9                   | IGS ( <i>ycf3, trnS-GGA</i> )  | 17                      | ATACTGCAATAATATGA                                      | 2             | LSC                   |
| 10                  | IGS ( <i>ndhC, trnV-UAC</i> )  | 13                      | ATTTTTTTATTAT                                          | 2             | LSC                   |
| 11                  | IGS ( <i>rbcL, accD</i> )      | 19                      | AGTTCCTATATTTATTTTG                                    | 2             | LSC                   |
| 12                  | IGS ( <i>rbcL, accD</i> )      | 46                      | TATAATATATATAGACTTG<br>ATCTAGATATAAAAAA<br>GATCTTATCTT | 2             | LSC                   |
| 13                  | IGS ( <i>rbcL, accD</i> )      | 15                      | AATGACTATTCATCT                                        | 2             | LSC                   |
| 14                  | IGS ( <i>psaI, ycf4</i> )      | 17                      | TATGTAGATATCCATAG                                      | 2             | LSC                   |
| 15                  | Exon ( <i>ycf2</i> )           | 18                      | TATTGATGATAGTGACGA                                     | 4             | IR                    |
| 16                  | IGS ( <i>rps12, trnV-GAC</i> ) | 16                      | ATTTTATTGATTTATT                                       | 2             | IR                    |
| 17                  | IGS ( <i>rrn5, trnR-ACG</i> )  | 12                      | AATATGAAAAAA                                           | 2             | IR                    |
| 18                  | IGS ( <i>ccsA, ndhD</i> )      | 15                      | TAGGAATAGCATATA                                        | 2             | SSC                   |
| 19                  | IGS ( <i>ndhE, ndhG</i> )      | 22                      | AATTAACTAAAATATAAT<br>CTAA                             | 2             | SSC                   |
| 20                  | Exon ( <i>ycf1</i> )           | 15                      | TTTTTATTTTCACTA                                        | 2             | SSC                   |

<sup>†</sup>IGS, intergenic spacer region.

<sup>§</sup>LSC, large single copy region; SSC, small single copy region; IR, inverted repeat.

**Table S9:** List of *Actaea* accession numbers used in this study.

| <i>A. heracleifolia</i> | Collection site                             | Voucher number   |
|-------------------------|---------------------------------------------|------------------|
| 1                       | Mungoksodo-dong, Taebaek-si, Gangwon-do     | KIOM201501013910 |
| 2                       | Daeseong, Hwagae, Hadong, Gyeongsangnam-do, | KIOM201401009497 |
| 3                       | Ungyo, Bangnim, Pyeongchang, Gangwon-do     | KIOM201401010685 |
| 4                       | Singi-ri, Jinbu, Pyeongchang, Gangwon-do    | KIOM201401011037 |
| <i>A. simplex</i>       |                                             |                  |
| 5                       | Gohan, Gohan, Jeongseon, Gangwon-do         | KIOM201401010623 |
| 6                       | Ungyo, Bangnim, Pyeongchang, Gangwon-do     | KIOM201401010683 |
| 7                       | Gohan, Gohan, Jeongseon, Gangwon-do         | KIOM201401010894 |
| 8                       | Taegi, Dunnae, Hoengseong, Gangwon-do       | KIOM201401011006 |
| <i>A. dahurica</i>      |                                             |                  |
| 9                       | Mungoksodo, Taebaek, Gangwon-do             | KIOM201501013910 |
| 10                      | Jeoksang, Muju, Jeollabuk-do                | KIOM200601000057 |
| 11                      | Gohan, Gohan, Jeongseon, Gangwon-do         | KIOM201401010625 |
| 12                      | Mungoksodo, Taebaek, Gangwon-do             | KIOM201501013910 |
| <i>A. biternata</i>     |                                             |                  |
| 13                      | Aewol, Jeju, Jeju-do                        | KIOM201001003333 |
| 14                      | Aewol, Jeju, Jeju-do                        | KIOM201001003331 |
| 15                      | Aewol, Jeju, Jeju-do                        | KIOM201101003949 |
| 16                      | Aewol, Jeju, Jeju-do                        | KIOM201101003950 |
| <i>A. asiatica</i>      |                                             |                  |
| 17                      | Icheon, Sangbuk, Ulju, Ulsan                | KIOM201401009748 |
| 18                      | Sannae, Namwon, Jeollabuk-do                | KIOM200801001156 |
| 19                      | Hyeol, Taebaek, Gangwon-do                  | KIOM201401009950 |
| 20                      | Danjibong, Gimcheon, Gyeongsangbuk-do       | KIOM201501011463 |



**Table S10:** Accession numbers of cp genomes used for phylogenetic analysis.

| Family       | Taxon                          | GenBank accession number |
|--------------|--------------------------------|--------------------------|
| Cimicifugeae | <i>Actaea heracleifolia</i>    | NC_042253                |
|              | <i>Actaea simplex</i>          | MN623225                 |
|              | <i>Actaea dahurica</i>         | MN623226                 |
|              | <i>Actaea biternata</i>        | MN623227                 |
|              | <i>Actaea asiatica</i>         | NC_041525                |
|              | <i>Actaea vaginata</i>         | NC_041543                |
|              | <i>Eranthis stellata</i>       | NC_041536                |
|              | <i>Beesia calthifolia</i>      | NC_041531                |
|              | <i>Anemonopsis macrophylla</i> | NC_041527                |

**Table S11:** Selection of the best-fitting substitution model for 65 conserved cp genes using jModelTest.

|     | <b>Model</b> | <b>f(a)</b> | <b>f(c)</b> | <b>f(g)</b> | <b>f(t)</b> | <b>kappa</b> | <b>titv</b> | <b>Ra</b>  | <b>Rb</b>    | <b>Rc</b>     | <b>Rd</b>        | <b>Re</b> | <b>Rf</b> | <b>pInv</b> | <b>Gamma</b> |
|-----|--------------|-------------|-------------|-------------|-------------|--------------|-------------|------------|--------------|---------------|------------------|-----------|-----------|-------------|--------------|
| AIC | GTR+I+G      | 0.3         | 0.19        | 0.18        | 0.31        | 2.4          | 1.13        | 0.77       | 1.28         | 0.24          | 0.2              | 1.34      | 1         | 0.488       | 0.216        |
|     | <b>Model</b> |             |             |             |             | <b>-lnL*</b> | <b>K</b>    | <b>AIC</b> | <b>delta</b> | <b>weight</b> | <b>cumWeight</b> |           |           |             |              |
|     | GTR+I+G      |             |             |             |             | 110141.7     | 26          | 220335.4   | 0            | 0.545852      | 0.545852         |           |           |             |              |
|     | TVM+I+G      |             |             |             |             | 110142.9     | 25          | 220335.7   | 0.37698      | 0.45208       | 0.997932         |           |           |             |              |
|     | TIM1+I+G     |             |             |             |             | 110149.8     | 24          | 220347.6   | 12.21892     | 0.001213      | 0.999145         |           |           |             |              |
|     | TPM1uf+I+G   |             |             |             |             | 110151.1     | 23          | 220348.3   | 12.9171      | 0.000855      | 1                |           |           |             |              |
|     | GTR+I        |             |             |             |             | 110163.6     | 25          | 220377.2   | 41.85256     | 4.46E-10      | 1                |           |           |             |              |
|     | TVM+I        |             |             |             |             | 110164.8     | 24          | 220377.6   | 42.25366     | 3.65E-10      | 1                |           |           |             |              |
|     | GTR+G        |             |             |             |             | 110167.2     | 25          | 220384.3   | 48.94602     | 1.28E-11      | 1                |           |           |             |              |
|     | TVM+G        |             |             |             |             | 110168.4     | 24          | 220384.8   | 49.4426      | 1.00E-11      | 1                |           |           |             |              |
|     | TIM1+I       |             |             |             |             | 110171.7     | 23          | 220389.4   | 54.07156     | 9.90E-13      | 1                |           |           |             |              |
|     | TPM1uf+I     |             |             |             |             | 110173.1     | 22          | 220390.1   | 54.77704     | 6.96E-13      | 1                |           |           |             |              |
|     | TIM1+G       |             |             |             |             | 110175.3     | 23          | 220396.6   | 61.28992     | 2.68E-14      | 1                |           |           |             |              |
|     | TPM1uf+G     |             |             |             |             | 110176.7     | 22          | 220397.4   | 62.01496     | 1.87E-14      | 1                |           |           |             |              |
|     | TIM2+I+G     |             |             |             |             | 110344       | 24          | 220736     | 400.6717     | 5.40E-88      | 1                |           |           |             |              |
|     | TPM2uf+I+G   |             |             |             |             | 110345.2     | 23          | 220736.4   | 401.0438     | 4.48E-88      | 1                |           |           |             |              |
|     | TIM2+I       |             |             |             |             | 110365.9     | 23          | 220777.7   | 442.3458     | 4.82E-97      | 1                |           |           |             |              |
|     | TPM2uf+I     |             |             |             |             | 110367.1     | 22          | 220778.1   | 442.7549     | 3.93E-97      | 1                |           |           |             |              |
|     | TIM2+G       |             |             |             |             | 110368.2     | 23          | 220782.4   | 447.0647     | 4.55E-98      | 1                |           |           |             |              |
|     | TPM2uf+G     |             |             |             |             | 110369.5     | 22          | 220782.9   | 447.5611     | 3.55E-98      | 1                |           |           |             |              |
|     | TrN+I+G      |             |             |             |             | 110368.5     | 23          | 220783     | 447.6685     | 3.37E-98      | 1                |           |           |             |              |
|     | HKY+I+G      |             |             |             |             | 110369.8     | 22          | 220783.7   | 448.3158     | 2.44E-98      | 1                |           |           |             |              |
|     | TIM3+I+G     |             |             |             |             | 110368.4     | 24          | 220784.7   | 449.3737     | 1.43E-98      | 1                |           |           |             |              |
|     | TPM3uf+I+G   |             |             |             |             | 110369.7     | 23          | 220785.4   | 450.0925     | 1.00E-98      | 1                |           |           |             |              |
|     | TrN+I        |             |             |             |             | 110390.3     | 22          | 220824.5   | 489.1669     | 3.28E-107     | 1                |           |           |             |              |
|     | HKY+I        |             |             |             |             | 110391.6     | 21          | 220825.2   | 489.8519     | 2.33E-107     | 1                |           |           |             |              |

\*-lnL, negative log likelihood; K, number of estimated parameters; AIC, Akaike Information Criterion; delta, AIC difference; weight, AIC weight; cumWeight, cumulative AIC weight.

**Table S12:** Selection of the best-fitting substitution model for whole cp genomes using jModelTest.

|     | <b>Model</b> | <b>f(a)</b>  | <b>f(c)</b> | <b>f(g)</b> | <b>f(t)</b> | <b>kappa</b> | <b>titv</b> | <b>Ra</b>    | <b>Rb</b>     | <b>Rc</b>        | <b>Rd</b> | <b>Re</b> | <b>Rf</b> | <b>pInv</b> | <b>Gamma</b> |
|-----|--------------|--------------|-------------|-------------|-------------|--------------|-------------|--------------|---------------|------------------|-----------|-----------|-----------|-------------|--------------|
| AIC | TVM+I+G      | 0.3          | 0.19        | 0.18        | 0.31        | 1.64         | 0.76        | 0.90         | 1.18          | 0.63             | 0.18      | 1.18      | 1         | 0.851       | 0.851        |
|     | <b>Model</b> | <b>-lnL*</b> |             |             |             | <b>K</b>     | <b>AIC</b>  | <b>delta</b> | <b>weight</b> | <b>cumWeight</b> |           |           |           |             |              |
|     | TVM+I+G      | 289185.5398  |             |             |             | 25           | 578421.0796 | 0            | 0.684392      | 0.684392         |           |           |           |             |              |
|     | GTR+I+G      | 289185.3138  |             |             |             | 26           | 578422.6277 | 1.54806      | 0.315608      | 1                |           |           |           |             |              |
|     | TVM+I        | 289222.7514  |             |             |             | 24           | 578493.5027 | 72.42312     | 1.28E-16      | 1                |           |           |           |             |              |
|     | GTR+I        | 289222.5696  |             |             |             | 25           | 578495.1392 | 74.05954     | 5.67E-17      | 1                |           |           |           |             |              |
|     | TPM1uf+I+G   | 289347.6132  |             |             |             | 23           | 578741.2265 | 320.14686    | 2.07E-70      | 1                |           |           |           |             |              |
|     | TIM1+I+G     | 289347.7098  |             |             |             | 24           | 578743.4196 | 322.33994    | 6.92E-71      | 1                |           |           |           |             |              |
|     | TPM1uf+I     | 289387.4426  |             |             |             | 22           | 578818.8852 | 397.80558    | 2.84E-87      | 1                |           |           |           |             |              |
|     | TIM1+I       | 289387.2983  |             |             |             | 23           | 578820.5966 | 399.51696    | 1.21E-87      | 1                |           |           |           |             |              |
|     | TVM+G        | 289399.9797  |             |             |             | 24           | 578847.9595 | 426.87984    | 1.38E-93      | 1                |           |           |           |             |              |
|     | GTR+G        | 289399.7773  |             |             |             | 25           | 578849.5546 | 428.47502    | 6.21E-94      | 1                |           |           |           |             |              |
|     | TPM3uf+I+G   | 289552.8185  |             |             |             | 23           | 579151.6371 | 730.55744    | 1.57E-159     | 1                |           |           |           |             |              |
|     | TIM3+I+G     | 289552.9781  |             |             |             | 24           | 579153.9561 | 732.87652    | 4.93E-160     | 1                |           |           |           |             |              |
|     | TPM1uf+G     | 289555.0684  |             |             |             | 22           | 579154.1367 | 733.0571     | 4.51E-160     | 1                |           |           |           |             |              |
|     | TIM1+G       | 289554.8922  |             |             |             | 23           | 579155.7845 | 734.70484    | 1.98E-160     | 1                |           |           |           |             |              |
|     | TPM2uf+I+G   | 289571.4373  |             |             |             | 23           | 579188.8746 | 767.795      | 1.29E-167     | 1                |           |           |           |             |              |
|     | HKY+I+G      | 289572.964   |             |             |             | 22           | 579189.9281 | 768.84844    | 7.62E-168     | 1                |           |           |           |             |              |
|     | TIM2+I+G     | 289571.3345  |             |             |             | 24           | 579190.669  | 769.58934    | 5.26E-168     | 1                |           |           |           |             |              |
|     | TrN+I+G      | 289575.0821  |             |             |             | 23           | 579196.1642 | 775.08454    | 3.37E-169     | 1                |           |           |           |             |              |
|     | TPM3uf+I     | 289589.1743  |             |             |             | 22           | 579222.3486 | 801.26896    | 6.95E-175     | 1                |           |           |           |             |              |
|     | TIM3+I       | 289588.9459  |             |             |             | 23           | 579223.8918 | 802.81222    | 3.21E-175     | 1                |           |           |           |             |              |
|     | TPM2uf+I     | 289608.0302  |             |             |             | 22           | 579260.0603 | 838.98072    | 4.50E-183     | 1                |           |           |           |             |              |
|     | TIM2+I       | 289607.8925  |             |             |             | 23           | 579261.785  | 840.70542    | 1.90E-183     | 1                |           |           |           |             |              |
|     | HKY+I        | 289612.2148  |             |             |             | 21           | 579266.4296 | 845.35002    | 1.86E-184     | 1                |           |           |           |             |              |
|     | TrN+I        | 289612.0516  |             |             |             | 22           | 579268.1031 | 847.0235     | 8.06E-185     | 1                |           |           |           |             |              |

\*-lnL, negative log likelihood; K, number of estimated parameters; AIC, Akaike Information Criterion; delta, AIC difference; weight, AIC weight; cumWeight, cumulative AIC weight.
